# Supplementary material
Source: Royal Society of Chemistry journal article supplement (doi:10.1039/d6ta01518b)
Supplement: d6ta01518b1.pdf [file d6ta01518b1.pdf]

## Supplementary Information

### High Voltage Hybrid Zn-MnO<sub>2</sub>/air Batteries via Decoupled

#### Electrolyte

Chengwei Wang <sup>a-c</sup>, Jintao Zhang <sup>b</sup>, Yanwei Lum <sup>b,c</sup>, Ming Liu <sup>a,d</sup>, Zhaolin Liu <sup>b\*</sup>, Bing

Li <sup>a\*</sup>

- a. State Key Laboratory of Space Power-Sources, School of Chemistry and Chemical Engineering, Harbin Institute of Technology, Harbin, Heilongjiang 150001, China
- b. Institute of Materials Research and Engineering (IMRE), Agency for Science, Technology and Research (A\*STAR), 2 Fusionopolis Way, #08-03 Innovis, Singapore 138634, Republic of Singapore
- c. Department of Chemical and Biomolecular Engineering, National University of Singapore, Singapore 117585, Republic of Singapore
- d. Engineering Laboratory of Advanced Energy Materials, Ningbo Institute of Materials Technology & Engineering, Chinese Academy of Sciences, Ningbo, Zhejiang 315201, China

Emails: ZL: [zl-liu@imre.a-star.edu.sg](mailto:zl-liu@imre.a-star.edu.sg); BL: [bing.li2020@hit.edu.cn](mailto:bing.li2020@hit.edu.cn);

## Experimental section

### Materials

Sulfuric acid (AR) was purchased from Tianjin Kemi Ou Chemical Reagent Co., LTD.  $\text{MnSO}_4 \cdot \text{H}_2\text{O}$  (AR,  $\geq 99\%$ ),  $\text{K}_2\text{SO}_4$  (AR,  $\geq 99\%$ ), KOH (AR,  $\geq 85\%$ ) and  $\text{Zn}(\text{CH}_3\text{COOH})_2$  ( $\geq 99\%$ ) was obtained from Shanghai Aladdin Biochemical Technology Co., LTD. The brand and model of the use of cation exchange membranes (CEM) are Fumasep PKB-PK-130. Similarly, the brand and model of the use of anion exchange membranes (AEM) are Fumasep Paa-3-PK-130. All commercially available chemicals were used as received, without further modifications.

### Synthesis of C@Co-N-C electrode

Firstly, the carbon felt electrode was coated with polydopamine (C@PDA), and the coating method has been reported in previous report.<sup>1</sup> Then the ZIF67 was *in-situ* growth on C@PDA, the synthesis method still refers to the reported study.<sup>2</sup> After that, the hybrid electrode was thermally treated in Ar at  $900^\circ\text{C}$  for 30 min to C@Co-N-C, as exhibited in Fig. S1. To determine the mass loading of Co-N-C on the carbon felt (CF), ten CF samples were weighted before and after Co-N-C deposition. The average mass loading was calculated to be  $2.3 \text{ mg cm}^{-2}$ . Furthermore, the C@Co-N-C electrode features distinct asymmetric wettability. The hydrophobic side prevents electrolyte leakage and helps establish a stable gas-liquid-solid interface for the ORR, while the hydrophilic side allows the electrolyte to contact with C@Co-N-C catalyst and carbon felt fiber to facilitate electrochemical reactions. This functional design was achieved via a two-step treatment. 1) The back surface was coated with a mixture of 10% PTFE and 2.5% active carbon (AC) by air spraying (PTFE loading:  $\sim 10 \text{ mg cm}^{-2}$ ). Subsequent annealing at  $300^\circ\text{C}$  for 2 h under nitrogen led to a superhydrophobic back surface with a contact angle  $>150^\circ$  (Fig. S3a,b). And 2)  $\text{O}_2$  plasma treatment (100 W, 2 min) rendered the electrode hydrophilic, evidenced by the rapid permeation of water droplets (Fig. 3Sc,d) during contact angle measurements.

### Battery fabrication

The Zn- $\text{MnO}_2$ /air battery was consisted of three chambers separated by CEM and

AEM that consist of three chambers, each with a different electrolyte, the anode alkaline chamber (6 M KOH / 0.2 M Zn(CH<sub>3</sub>COO)<sub>2</sub>), the cathode acidic chamber (3 M H<sub>2</sub>SO<sub>4</sub> / 1 M MnSO<sub>4</sub>), and the neutral chamber (0.5 M K<sub>2</sub>SO<sub>4</sub>) that separates the two electrode chambers. The volume of electrolyte in each chamber is 6 mL. The Zn plate as anode and the synthesized multi-functional electrode as cathode, respectively. A customized acrylic mold is used as the overall structure of the battery, silicone pads are used for sealing, and bolts and nuts are used as fasteners for the battery. The multi-function cathode has a thickness of 2 mm, where one side interfaces with the electrolyte while the other interfaces with air, each side possessing a contact area of 1 cm<sup>2</sup>. For the decoupled electrolyte Zn-MnO<sub>2</sub> battery, the assembly method aligns with that of the Zn-MnO<sub>2</sub>/air battery, except for the sealing of the electrodes in the electrolyte to isolate them from the ambient air. Unless specified, the Zn-MnO<sub>2</sub> battery referred to in the text specifically refers to the decoupled electrolyte Zn-MnO<sub>2</sub> battery.

### **Characterizations**

The morphology images were observed from the scanning electron microscope (SEM, TESCAN AMBER, The Czech Republic) equipped with an energy-dispersive X-ray spectrometer (EDS) to investigate the surface element compositions of the materials. X-ray diffraction (XRD) patterns were conducted by Model D8 Avance X-ray diffractometer (Bruker, Germany) with Cu Ka radiation ( $\lambda = 0.15418$  nm). Raman spectroscopy was measured by a RENISHAW Raman spectrometer with a laser wavelength of 532 nm. The elemental valence states of the electrode were determined using X-ray photoelectron spectroscopy (XPS) on Thermo Fisher, ESCALAB250Xi.

### **Electrochemical Measurements**

The evaluated cyclic voltammetry (CV) curves and linear sweep voltammetry (LSV) curves of the batteries were tested in an electrochemical workstation (CHI 660E, CH Instrument), the charge and discharge curves (GCD) were measured in the NEWARE battery test system. For Zn-MnO<sub>2</sub>/air battery, during the performance evaluation of the Zn-air cell, the potential window testing range for CV and LSV curves is 1.2 to 2.7 V, while for the hybrid batteries, it is 1.2 to 3.0 V, as at 3.0 V potential, Mn<sup>2+</sup> oxidizes to MnO<sub>2</sub>. Additionally, for both the hybrid Zn-MnO<sub>2</sub>/air battery and the

Zn-MnO<sub>2</sub> battery, the charging potential during charge and discharge testing is set at 3.0 V. In the case of the Zn-MnO<sub>2</sub> battery, the discharge cutoff voltage is set at 1.0 V.

### Calculation Method

In the decoupled electrolyte Zn-MnO<sub>2</sub> battery, the electrochemical reactions occur as following:

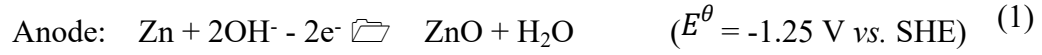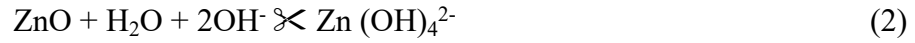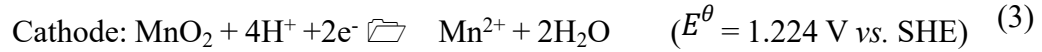

According to Nernst equation, the electrode potential of cathode ( $E_C$ ) and anode ( $E_A$ ) can be calculated by following equations:

$$E_{C(\text{MnO}_2)} = E_{\text{Mn}^{2+}/\text{MnO}_2}^\theta + \frac{RT}{nF} \ln \frac{\alpha_{\text{MnO}_2} \alpha_1}{\alpha_{\text{Mn}^{2+}} \alpha} \quad (4)$$

$$E_A = E_{\text{ZnO}/\text{Zn}}^\theta + \frac{RT}{nF} \ln \frac{\alpha_{\text{ZnO}} \alpha_{\text{H}_2\text{O}}}{\alpha_{\text{Zn}} \alpha_{\text{OH}^-}^2} \quad (5)$$

For the decoupled electrolyte Zn-air battery, the anode reaction is consistent with the Zn-MnO<sub>2</sub> battery, with the cathode reaction equation as follows:

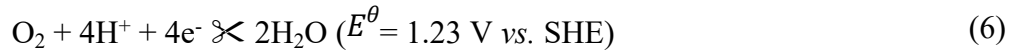

The cathode voltage of Zn-air battery is calculated as follows:

$$E_{C(\text{air})} = E_{\text{O}_2/\text{H}_2\text{O}}^\theta + \frac{RT}{nF} \ln \frac{(P_{\text{O}_2}/P^\theta) \alpha_{\text{H}^+}^4}{\alpha_{\text{H}_2\text{O}}^2} \quad (7)$$

Considering the potential difference on both sides of the ion exchange membrane, it is necessary to calculate the transmembrane potential to correct the theoretical voltage of decoupled electrolyte Zn-MnO<sub>2</sub> battery. The transmembrane potential across the CEM is determined by the K<sup>+</sup> concentration, whereas the transmembrane potential across the AEM is contingent upon the SO<sub>4</sub><sup>2-</sup> concentration, as follows:<sup>3,4</sup>

$$E_{CEM} = \frac{RT}{nF} \ln \frac{2\alpha_{K_2SO_4}}{\alpha_{KOH}} \quad (8)$$

$$E_{AEM} = \frac{RT}{nF} \ln \frac{\alpha_{H_2SO_4} + \alpha_{MnSO_4}}{\alpha_{K_2SO_4}} \quad (9)$$

Where R (8.3144 J K<sup>-1</sup> mol<sup>-1</sup>) is the value of gas constant, T (298 K) is temperature, n is the electron transfer number, and F (96.487 kJ V<sup>-1</sup> mol<sup>-1</sup>) is Faraday's constant. In the ideal solution, the activity value of solids and liquids are considered as 1 and the ions activity values are the corresponding concentration values. The partial pressure of oxygen is 21% of atmospheric pressure. The concentration of H<sub>2</sub>SO<sub>4</sub> ranges from 0.1 to 4 M, the concentration of MnSO<sub>4</sub> is 1 M, and the concentration of K<sub>2</sub>SO<sub>4</sub> is 0.5 M. Eventually, the theoretical voltage calculation method for the Zn-MnO<sub>2</sub> battery could be calculated as following equation, and the detailed values are showed in Table 1.

$$E = (E_C + E_{CEM}) - (E_{AEM} + E_A) \quad (10)$$

**Table S1** Theoretical voltage of Zn-MnO<sub>2</sub> and Zn-air batteries at different H<sub>2</sub>SO<sub>4</sub> concentrations

| H <sub>2</sub> SO <sub>4</sub><br>(M) | Zn-MnO <sub>2</sub><br>E (V) | Zn-air<br>E (V) | H <sub>2</sub> SO <sub>4</sub><br>(M) | Zn-MnO <sub>2</sub><br>E (V) | Zn-air<br>E (V) |
|---------------------------------------|------------------------------|-----------------|---------------------------------------|------------------------------|-----------------|
| 0.1                                   | 2.576                        | 2.537           | 2.0                                   | 2.744                        | 2.629           |
| 0.3                                   | 2.634                        | 2.568           | 2.5                                   | 2.758                        | 2.637           |
| 0.5                                   | 2.663                        | 2.583           | 3.0                                   | 2.769                        | 2.643           |
| 1.0                                   | 2.702                        | 2.605           | 3.5                                   | 2.778                        | 2.649           |
| 1.5                                   | 2.726                        | 2.619           | 4.0                                   | 2.787                        | 2.653           |

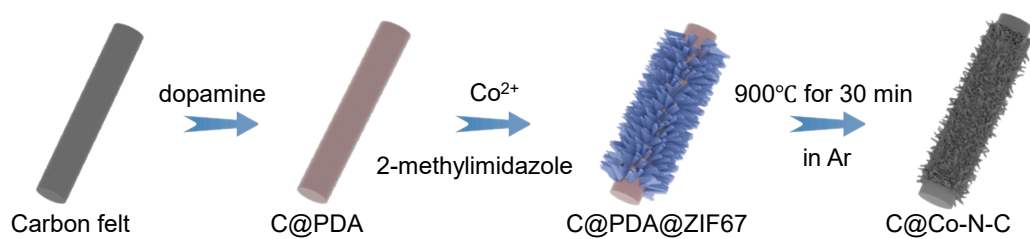

**Fig. S1** Schematic illustration of C@Co-N-C electrode preparation.

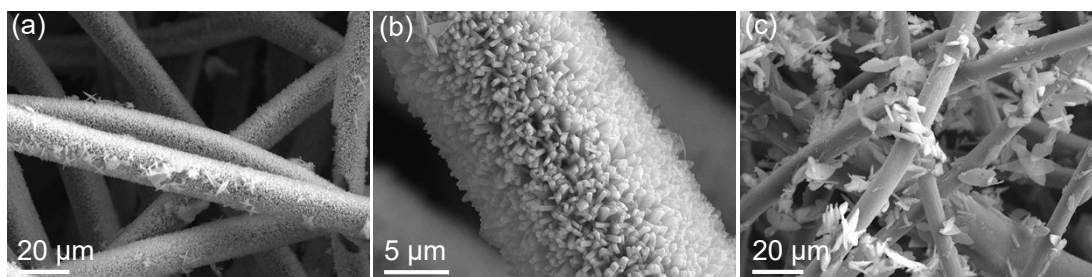

**Fig. S2** (a, b) SEM images of *in-situ* growth of ZIF67 on carbon felt after PDA modification (C@PDA@ZIF67); (c) SEM image of *in-situ* growth of ZIF67 on carbon felt without PDA modification.

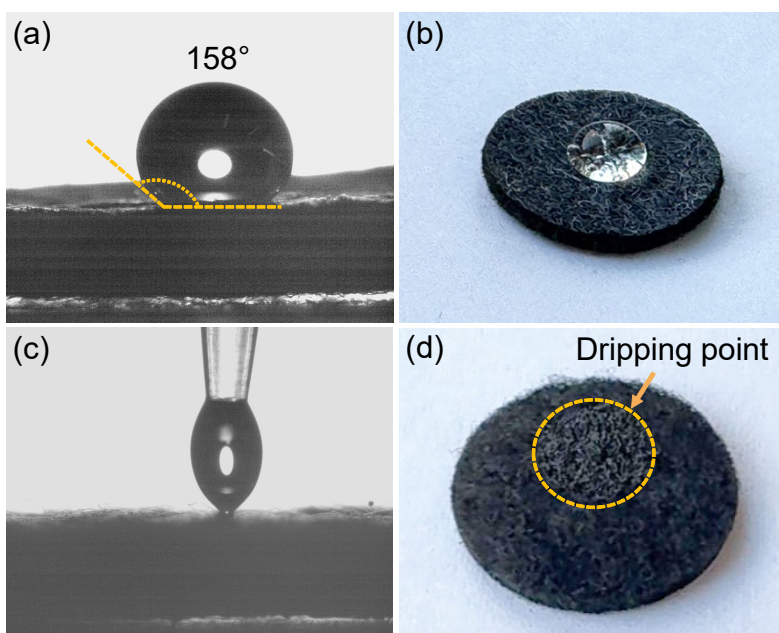

**Fig. S3** (a) Contact angle tests of hydrophobic surface of C@Co-N-C; (b) Photograph of the water droplet test on the hydrophobic surface of Co-N-C; (c) Contact angle tests of hydrophilic surface of C@Co-N-C; (d) Photograph of the water droplet test on the hydrophilic surface of Co-N-C.

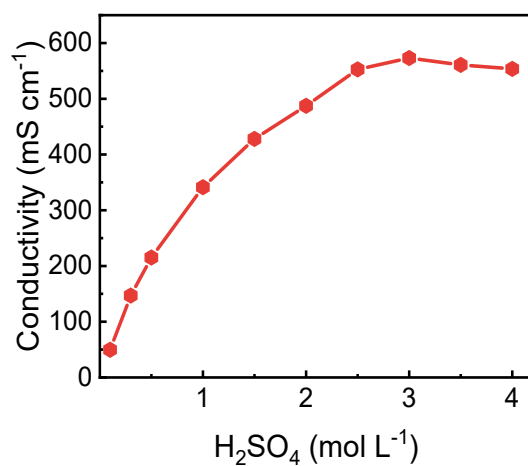

**Fig. S4** The electrolyte conductivity under different H<sub>2</sub>SO<sub>4</sub> concentrations range from 0.1 ~ 4 M.

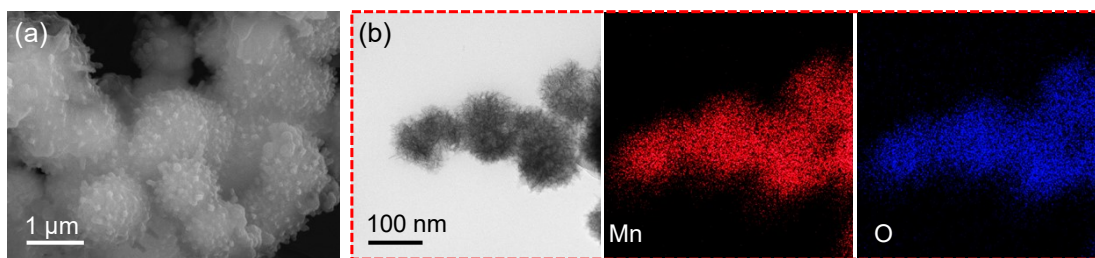

**Fig. S5** (a) SEM image of MnO<sub>2</sub>; (b) TEM image and elemental mappings of Mn and O.

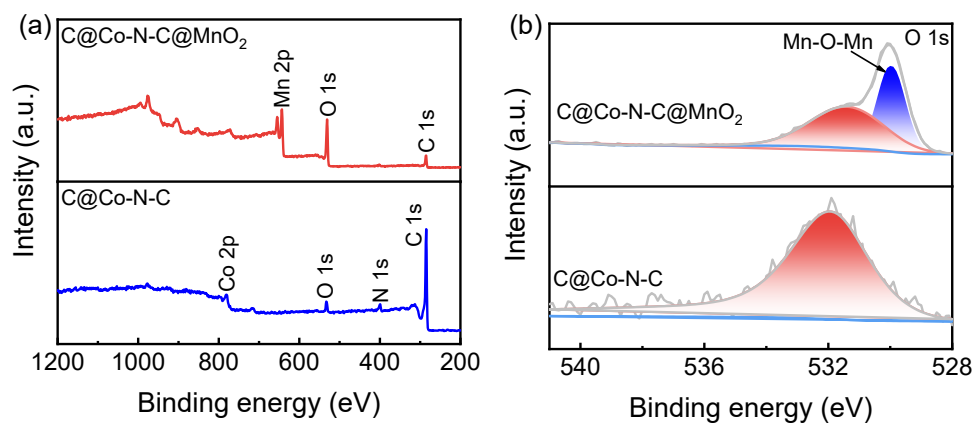

**Fig. S6** XPS spectra comparison of C@Co-N-C@MnO<sub>2</sub> and C@Co-N-C. (a) A survey scan; (b) O 1s.

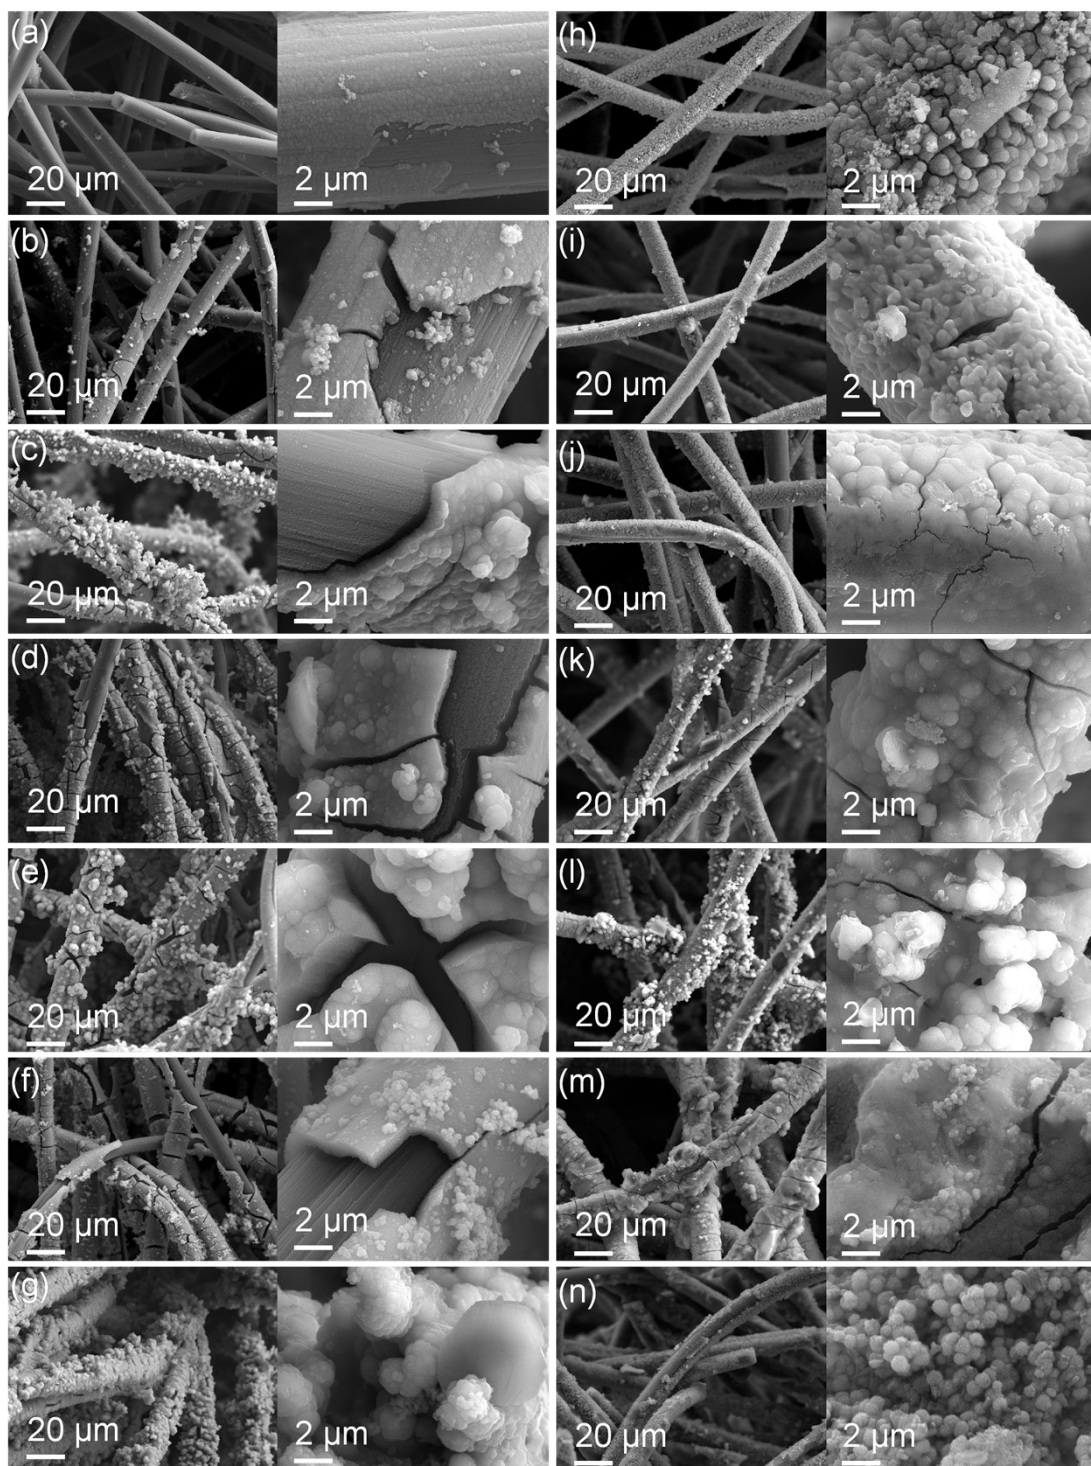

**Fig. S7** SEM comparison images of carbon felt (a-g) and Co@Co-N-C (h-n) electrode surface with deposition of MnO<sub>2</sub> at different charging capacities; (a, h) 5 mAh cm<sup>-2</sup>; (b, i) 10 mAh cm<sup>-2</sup>; (c, j) 15 mAh cm<sup>-2</sup>; (d, k) 20 mAh cm<sup>-2</sup>; (e, l) 25 mAh cm<sup>-2</sup>; (f, m) 30 mAh cm<sup>-2</sup>; (g, n) 35 mAh cm<sup>-2</sup>.

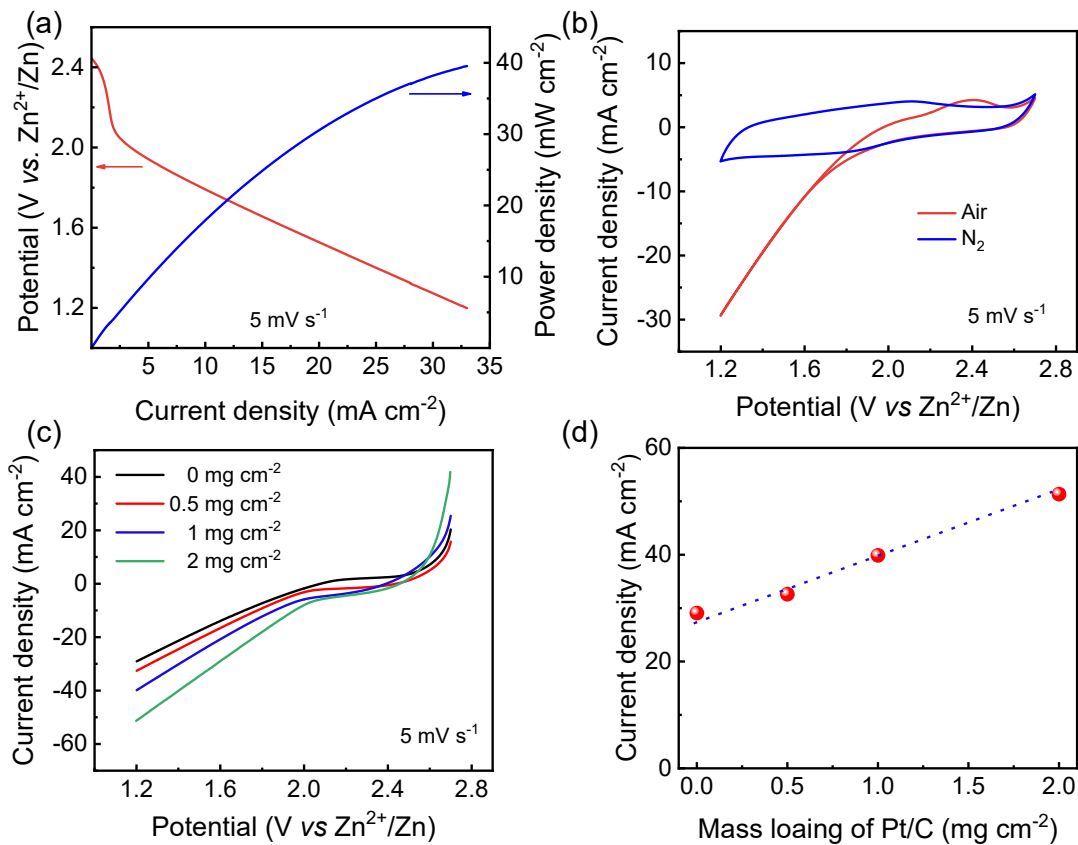

**Fig. S8** (a) Electrochemical performance of decoupled electrolyte Zn-air battery. (a) LSV curve and power density with C@Co-N-C electrode; (b) CV curves for air and nitrogen atmospheres without deposition of MnO<sub>2</sub>; (c) LSV curve of decoupled electrolyte Zn-air battery using different mass loading of Pt/C catalyst (0.5 ~ 2 mg cm<sup>-2</sup>); (d) The current densities at different Pt/C loading at 1.2 V estimated according to the LSV curves in (c).

**Table S2** Summary of output voltage and areal capacity of Zn-MnO<sub>2</sub> based batteries on reported studies

| Areal capacity (mAh cm <sup>-2</sup> ) | Voltage (V) | Current density          | Electrolyte                                                                                                                                        | Anode          | Cathode                      | Ref.      |
|----------------------------------------|-------------|--------------------------|----------------------------------------------------------------------------------------------------------------------------------------------------|----------------|------------------------------|-----------|
| 175                                    | 2.63        | 2 mA cm <sup>-2</sup>    | 6 KOH + 0.2 Zn(Ac) <sub>2</sub> // 0.5 M K <sub>2</sub> SO <sub>4</sub> // 3 M H <sub>2</sub> SO <sub>4</sub> + 1 M MnSO <sub>4</sub>              | zinc plate     | carbon felt                  | This work |
| 1                                      | 2.44        | 1 C                      | 3 M NaOH + 0.3 M ZnO // 3 M MnSO <sub>4</sub> + 0.3M H <sub>2</sub> SO <sub>4</sub> + 0.06M NiSO <sub>4</sub>                                      | Zn@carbon-felt | carbon felt                  | 5         |
| 16                                     | 2.25        | 2 mA cm <sup>-2</sup>    | 2.4 M KOH + 0.1 M Zn(CH <sub>3</sub> COO) <sub>2</sub> // 0.5 M H <sub>2</sub> SO <sub>4</sub> + 1.0 M MnSO <sub>4</sub>                           | Zn foil        | carbon cloth                 | 6         |
| 0.48                                   | 1.84        | 2.5 mA cm <sup>-2</sup>  | 2.4 M KOH + 0.1 M Zn(CH <sub>3</sub> COO) <sub>2</sub> // 1.0 M H <sub>2</sub> SO <sub>4</sub> , 0.3 M CuSO <sub>4</sub> + 1.0 M MnSO <sub>4</sub> | Zn foil        | Cu BPE                       | 7         |
| 0.35                                   | 1.8         | 2 mA cm <sup>-2</sup>    | 2 M ZnSO <sub>4</sub> + 0.005 M MnSO <sub>4</sub>                                                                                                  | Zn foil        | MnO <sub>2</sub> /CNTs foam  | 8         |
| 2.75                                   | 1.92        | 10 mA cm <sup>-2</sup>   | 1 M ZnSO <sub>4</sub> + 1 M MnSO <sub>4</sub>                                                                                                      | Zn foil        | carbon cloth                 | 9         |
| 50                                     | 1.4         | 20 mA cm <sup>-2</sup>   | 1 M Zn(Ac) <sub>2</sub> + 1 M Mn(Ac) <sub>2</sub> + 2 M KCl+0.1 M KI                                                                               | zinc plate     | carbon felt                  | 10        |
| 1.2                                    | 1.4         | 1 mA cm <sup>-2</sup>    | 2 M ZnSO <sub>4</sub> + 0.1 M MnSO <sub>4</sub>                                                                                                    | zinc plate     | α-MnO <sub>2</sub> /CNT      | 11        |
| 15                                     | 1.98        | 13.3 mA cm <sup>-2</sup> | 1 M MnSO <sub>4</sub> + 1 M ZnSO <sub>4</sub> + 0.2 M H <sub>2</sub> SO <sub>4</sub> + 0.05 M ZnBr <sub>2</sub> + 0.2 M Br <sub>2</sub>            | Zn foil        | carbon felt                  | 12        |
| 9                                      | 1.85        | 10 mA cm <sup>-2</sup>   | 1 M MnSO <sub>4</sub> + 1 M ZnSO <sub>4</sub> + 0.075 M ZnI <sub>2</sub>                                                                           | Zn foil        | carbon felt                  | 13        |
| 12.08                                  | 0.85        | 2 mA cm <sup>-2</sup>    | 2 M ZnSO <sub>4</sub> + 0.1 M MnSO <sub>4</sub>                                                                                                    | Zn foil        | MnO <sub>2</sub> /Cu-Ti foam | 14        |
| 8                                      | 1.3         | N/A                      | 3 M Zn(ClO <sub>4</sub> ) <sub>2</sub>                                                                                                             | Zn             | α-MnO <sub>2</sub>           | 15        |
| 18                                     | 2.05        | 20 mA cm <sup>-2</sup>   | 0.5 M ZnSO <sub>4</sub> + 1 M LiTFSI // 1 M MnSO <sub>4</sub> + 1 M HTFSI                                                                          | Zn foil        | carbon paper                 | 16        |
| 13.3                                   | 1.4         | 40 mA cm <sup>-2</sup>   | 0.5 M Mn(Ac) <sub>2</sub> + 0.5 M Zn(Ac) <sub>2</sub> + 2 M KCl                                                                                    | graphite felt  | graphite felt                | 17        |
| 0.99                                   | 1.75        | 0.5 mA cm <sup>-2</sup>  | 2 M ZnCl <sub>2</sub> + 0.07 M Mn(H <sub>2</sub> PO <sub>4</sub> ) <sub>2</sub>                                                                    | Zn foil        | Graphite foil                | 18        |
| 5                                      | 1.9         | 8 mA cm <sup>-2</sup>    | 0.1 M H <sub>2</sub> SO <sub>4</sub> + 1 M ZnSO <sub>4</sub> + 1 M MnSO <sub>4</sub> + 2 mg                                                        | Zn@Pb-Ad       | graphite felt                | 19        |

|      |      |                           |                                                                                                                                                                                                           |                    |                                     |    |
|------|------|---------------------------|-----------------------------------------------------------------------------------------------------------------------------------------------------------------------------------------------------------|--------------------|-------------------------------------|----|
|      |      |                           | Pb(OAc) <sub>2</sub>                                                                                                                                                                                      |                    |                                     |    |
| 2.6  | 1.92 | 1<br>mA cm <sup>-2</sup>  | BF <sub>4</sub> -SO <sub>4</sub> -1.5                                                                                                                                                                     | Zn foil            | carbon cloth                        | 20 |
| 3.54 | 1.3  | 1<br>mA cm <sup>-2</sup>  | 2.0 M ZnSO <sub>4</sub> +0.4 M<br>MnSO <sub>4</sub>                                                                                                                                                       | Zn<br>nanosheets   | K <sub>0.133</sub> MnO <sub>2</sub> | 21 |
| 77   | 2    | 10<br>mA cm <sup>-2</sup> | 1 M ZnSO <sub>4</sub> + 1 M<br>NaAc + 1 M HAc//1<br>M MnSO <sub>4</sub> + 0.5 M<br>H <sub>2</sub> SO <sub>4</sub> + 1 M<br>Na <sub>2</sub> SO <sub>4</sub> + 0.15 M<br>FeSO <sub>4</sub>                  | zinc<br>plate      | carbon felt                         | 22 |
| 40   | 1.5  | 20<br>mA cm <sup>-2</sup> | 0.5 M Mn(Ac) <sub>2</sub> +0.5<br>M Zn(Ac) <sub>2</sub> + 2 M<br>KCl                                                                                                                                      | zinc<br>plate      | CNT/<br>CF-700                      | 23 |
| 88   | 1.7  | 20<br>mA cm <sup>-2</sup> | 2 M ZnSO <sub>4</sub> + 1 M<br>Na <sub>2</sub> SO <sub>4</sub> // 2 M<br>MnSO <sub>4</sub> + 1 M<br>Na <sub>2</sub> SO <sub>4</sub> + 0.2M<br>H <sub>2</sub> SO <sub>4</sub> + 50 mM<br>VOSO <sub>4</sub> | zinc foil          | 3DGAs                               | 24 |
| 9    | 1.91 | 20<br>mA cm <sup>-2</sup> | 3 M ZnCl <sub>2</sub> + 1 M<br>Zn(Ac) <sub>2</sub> + 1M HAc<br>// 1 M MnCl <sub>2</sub> + 0.2<br>M HCl + 4 M<br>MgCl <sub>2</sub>                                                                         | graphite<br>plates | graphite<br>plates                  | 25 |
| 2    | 1.95 | 2<br>mA cm <sup>-2</sup>  | 1 M ZnSO <sub>4</sub> + 1 M<br>MnSO <sub>4</sub> + 0.1 M<br>H <sub>2</sub> SO <sub>4</sub>                                                                                                                | Zn foam            | carbon cloth                        | 26 |
| 14.5 | 1.95 | 1 C                       | 1 M MnSO <sub>4</sub> + 1 M<br>ZnSO <sub>4</sub> + 0.1 M<br>H <sub>2</sub> SO <sub>4</sub> + 0.05 HPD                                                                                                     | zinc foil          | carbon felt                         | 27 |
| 46.9 | 1.9  | 50<br>mA cm <sup>-2</sup> | 0.05 M H <sub>2</sub> SO <sub>4</sub> + 1<br>M ZnSO <sub>4</sub> + 0.5 M<br>MnSO <sub>4</sub> + Al-HQ                                                                                                     | Zn foil            | graphite felt                       | 28 |
| 18.9 | 1.95 | 20<br>mA cm <sup>-2</sup> | 1 M MnSO <sub>4</sub> + 1 M<br>ZnSO <sub>4</sub> + x mg/ml<br>SiO <sub>2</sub> + y M FeSO <sub>4</sub> +<br>0.1 M H <sub>2</sub> SO <sub>4</sub>                                                          | Zn foil            | carbon felt                         | 29 |

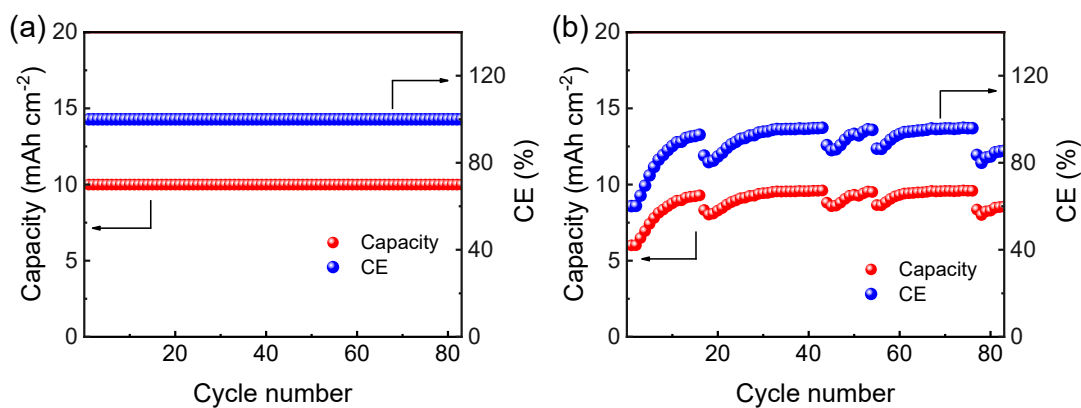

**Fig. S9** (a) Cycle stability of hybrid Zn-MnO<sub>2</sub>/air battery; (b) Cycle stability of Zn-MnO<sub>2</sub> battery.

**Table S3** Comparison of cycle stability of Zn-MnO<sub>2</sub> batteries in recent reports

| Batteries                             | Cycle number | Current density       | Capacity retention rate (%) | Electrolyte                                                                                                                           | Cathode                                                 | Ref.      |
|---------------------------------------|--------------|-----------------------|-----------------------------|---------------------------------------------------------------------------------------------------------------------------------------|---------------------------------------------------------|-----------|
| Zn-MnO <sub>2</sub> /air              | 83           | 5 mA cm <sup>-2</sup> | 100                         | 6 KOH + 0.2 Zn(Ac) <sub>2</sub> // 0.5 M K <sub>2</sub> SO <sub>4</sub> // 3 M H <sub>2</sub> SO <sub>4</sub> + 1 M MnSO <sub>4</sub> | carbon felt                                             | This work |
| Zn-MnO <sub>2</sub>                   | 2000         | 2 A g <sup>-1</sup>   | 93.8                        | PU-EG+DMPA-Zn                                                                                                                         | MnO <sub>2</sub>                                        | 30        |
| flexible Zn-MnO <sub>2</sub>          | 100          | 1A g <sup>-1</sup>    | 99                          | PVA-ZnSO <sub>4</sub> -MnSO <sub>4</sub>                                                                                              | CC@CNF <sub>1</sub> /CNT <sub>2</sub> -MnO <sub>2</sub> | 31        |
| flexible Zn-MnO <sub>2</sub>          | 100          | 0.8C                  | 70                          | K <sub>3.6</sub> S <sub>1</sub> A <sub>20</sub> /Zn(TFSI) <sub>2</sub> + LiTFSI                                                       | MnO <sub>2</sub> @CC                                    | 32        |
| Zn-MnO <sub>2</sub>                   | 14000        | 5A g <sup>-1</sup>    | 87                          | 2 M ZnSO <sub>4</sub> + 0.2 M MnSO <sub>4</sub>                                                                                       | P-MnO <sub>2</sub>                                      | 33        |
| quasi-solid-state Zn-MnO <sub>2</sub> | >1000        | 10 A g <sup>-1</sup>  | 99.1                        | PAMPS/PAM                                                                                                                             | δ-MnO <sub>2</sub>                                      | 34        |
| Zn-MnO <sub>2</sub>                   | 1000         | 5 A g <sup>-1</sup>   | 83                          | 2 M ZnSO <sub>4</sub> + 0.2 M MnSO <sub>4</sub>                                                                                       | EDB@MnO <sub>2</sub>                                    | 35        |
| Zn-MnO <sub>2</sub>                   | 2000         | 4A g <sup>-1</sup>    | ~100                        | EG-PUA/PAM                                                                                                                            | CACO-δ-MnO <sub>2</sub>                                 | 36        |
| Zn-MnO <sub>2</sub>                   | 1000         | 2 A g <sup>-1</sup>   | 90.7                        | BE + MnSO <sub>4</sub> + SNC                                                                                                          | MnO <sub>2</sub> /CNT                                   | 37        |
| Zn-MnO <sub>2</sub>                   | 1500         | 1C                    | 94                          | 1 M MnSO <sub>4</sub> + 1 M ZnSO <sub>4</sub> + 0.1 M H <sub>2</sub> SO <sub>4</sub> + 0.05 M HPD                                     | carbon felt                                             | 27        |

|                     |      |                          |    |                              |               |    |
|---------------------|------|--------------------------|----|------------------------------|---------------|----|
| Zn-MnO <sub>2</sub> | 5000 | 5 mA<br>cm <sup>-2</sup> | 90 | H <sub>2</sub> O + DMSO + SL | graphite felt | 38 |
|---------------------|------|--------------------------|----|------------------------------|---------------|----|

**Table S4** Comparison of cycle stability of Zn-air batteries in recent reports

| Batteries                | Cycle time (h) | Current density (mA cm <sup>-2</sup> ) | Electrolyte                                                                                                                           | Cathode                                  | Ref.      |
|--------------------------|----------------|----------------------------------------|---------------------------------------------------------------------------------------------------------------------------------------|------------------------------------------|-----------|
| Zn-MnO <sub>2</sub> /air | 278            | 5                                      | 6 KOH + 0.2 Zn(Ac) <sub>2</sub> // 0.5 M K <sub>2</sub> SO <sub>4</sub> // 3 M H <sub>2</sub> SO <sub>4</sub> + 1 M MnSO <sub>4</sub> | carbon felt                              | This work |
| quasi-solid-state Zn-air | 337            | 1                                      | 6 M KOH + 0.2 M Zn(Ac) <sub>2</sub>                                                                                                   | PtCo-NPSC                                | 39        |
| Zn-air                   | 300            | 10                                     | 6 M KOH + 0.2 M Zn(Ac) <sub>2</sub>                                                                                                   | Fe-NC HDAC + RuO <sub>2</sub>            | 40        |
| Zn-Air                   | 500            | 10                                     | 6 M KOH + 0.2 M Zn(Ac) <sub>2</sub>                                                                                                   | NPVG/P_ene-1                             | 41        |
| Zn-air                   | 330            | 10                                     | 6 M KOH + 0.2 M Zn(Ac) <sub>2</sub>                                                                                                   | Co-SAs/NVPC                              | 42        |
| Zn-air                   | 100            | 10                                     | 6 M KOH + 0.2 M Zn(Ac) <sub>2</sub>                                                                                                   | Co <sub>9</sub> S <sub>8</sub> /CoS@NSC  | 43        |
| Zn-air                   | 100            | 5                                      | 6 M KOH + 0.2 M Zn(Ac) <sub>2</sub>                                                                                                   | Co@N-CNT/N-GY                            | 44        |
| Zn-air                   | 170            | 10                                     | 6 M KOH + 0.2 M Zn(Ac) <sub>2</sub>                                                                                                   | Co/Co <sub>9</sub> S <sub>8</sub> /NC    | 45        |
| Zn-air                   | 330            | 5                                      | 6 M KOH + 0.2 M Zn(Ac) <sub>2</sub>                                                                                                   | Fe <sub>3</sub> C@NSC                    | 46        |
| Zn-air                   | 550            | 5                                      | 6 M KOH + 0.2 M Zn(Ac) <sub>2</sub>                                                                                                   | IrFe-SACs                                | 47        |
| Zn-air                   | 1000           | 5                                      | 6 M KOH + 0.2 M Zn(Ac) <sub>2</sub>                                                                                                   | Fe <sub>3</sub> O <sub>4</sub> @NC/FeCuN | 48        |
| Zn-air                   | 1350           | 5                                      | 6 M KOH + 0.2 M Zn(Ac) <sub>2</sub>                                                                                                   | FeNi/FeNiO-NCS                           | 49        |

**Table S5** Comparison of cycle stability of reported hybrid Zn batteries

| Batteries                                                | Cycle time (h) | Current density (mA cm <sup>-2</sup> ) | Electrolyte                                                                                                                           | Cathode                                                                             | Ref.      |
|----------------------------------------------------------|----------------|----------------------------------------|---------------------------------------------------------------------------------------------------------------------------------------|-------------------------------------------------------------------------------------|-----------|
| Zn-MnO <sub>2</sub> /air                                 | 278            | 5                                      | 6 KOH + 0.2 Zn(Ac) <sub>2</sub> // 0.5 M K <sub>2</sub> SO <sub>4</sub> // 3 M H <sub>2</sub> SO <sub>4</sub> + 1 M MnSO <sub>4</sub> | carbon felt                                                                         | This work |
| Zn-Ag/air                                                | 10             | 1                                      | 6 KOH+0.2 M Zn(Ac) <sub>2</sub>                                                                                                       | Ag/RuO <sub>2</sub> /CNT                                                            | 50        |
| Zn-Co <sub>3</sub> O <sub>4</sub> /air                   | 440            | 10                                     | 6 M KOH and 0.2 M Zn(AC) <sub>2</sub>                                                                                                 | Co <sub>3</sub> O <sub>4</sub> on CFC                                               | 51        |
| Zn-Ag/Air                                                | 551            | 10                                     | 6 M KOH and 0.2 M Zn(AC) <sub>2</sub>                                                                                                 | Ag/stainless steel                                                                  | 52        |
| Zn-Co <sub>3</sub> O <sub>4</sub> /air                   | 100            | 10                                     | 6 M KOH and 0.2 M Zn(AC) <sub>2</sub>                                                                                                 | Co <sub>3</sub> O <sub>4</sub> /carbon cloth                                        | 53        |
| Zn-Co <sub>3</sub> O <sub>4</sub> /air                   | 330            | 10                                     | 6 M KOH and 0.1 M Zn(AC) <sub>2</sub>                                                                                                 | Co <sub>3</sub> O <sub>4</sub> /Ni foam                                             | 54        |
| Zn-NiCo <sub>2</sub> S <sub>4</sub> /Air                 | 400            | 5                                      | 4 M KOH and 0.2 M Zn(AC) <sub>2</sub>                                                                                                 | NiCo <sub>2</sub> S <sub>4</sub> /3DNCC                                             | 55        |
| Zn-Ni <sub>3</sub> S <sub>2</sub> /air                   | 33             | 10                                     | 6 M KOH and 0.2 M Zn(AC) <sub>2</sub>                                                                                                 | Ni@Ni <sub>3</sub> S <sub>2</sub>                                                   | 56        |
| Zn-Co <sub>3</sub> O <sub>4</sub> /air                   | 300            | 1                                      | 4.0 M KOH                                                                                                                             | O-Co <sub>3</sub> O <sub>4</sub> @MCN                                               | 57        |
| quasi-neutral Zn-MnO <sub>2</sub> /air                   | 1350           | 5                                      | 2 M NH <sub>4</sub> Cl + 0.2 M ZnCl <sub>2</sub> + 0.02 M MnSO <sub>4</sub>                                                           | PMO/N-rGO                                                                           | 58        |
| Zn-Co <sub>3-x</sub> Ni <sub>x</sub> O <sub>4</sub> /air | 200            | 5                                      | KOH-PVA gel                                                                                                                           | NS@Co <sub>3-x</sub> Ni <sub>x</sub> O <sub>4</sub> /Co <sub>3</sub> O <sub>4</sub> | 59        |
| Zn-Cu/Ni/air                                             | 500            | 5                                      | 6 M KOH + 0.2 M Zn(AC) <sub>2</sub>                                                                                                   | Cu <sub>x</sub> O@NiFe-LDH/Co-N-C                                                   | 60        |
| Zn-Ni/air                                                | 400            | 2                                      | 3.5 g ZnO + 0.18 g LiOH + 100 g 30 wt.% KOH                                                                                           | NiCo <sub>2</sub> O <sub>4</sub> /N-G                                               | 61        |
| Zn-Co/air                                                | 700            | 20                                     | 6 M KOH / 0.2 M Zn(AC) <sub>2</sub>                                                                                                   | Co/Co <sub>2</sub> P@PNCf                                                           | 62        |
| neutral Zn-Air/MnO <sub>2</sub>                          | 100            | 1                                      | 1 M ZnSO <sub>4</sub> + 0.1 M MnSO <sub>4</sub>                                                                                       | CNTs/carbon paper                                                                   | 63        |
| Zn-Ni/air                                                | 2500           | 5                                      | 6 M KOH / 0.2 M Zn(AC) <sub>2</sub>                                                                                                   | NiCo <sub>2</sub> O <sub>4</sub> /NiF@C                                             | 64        |

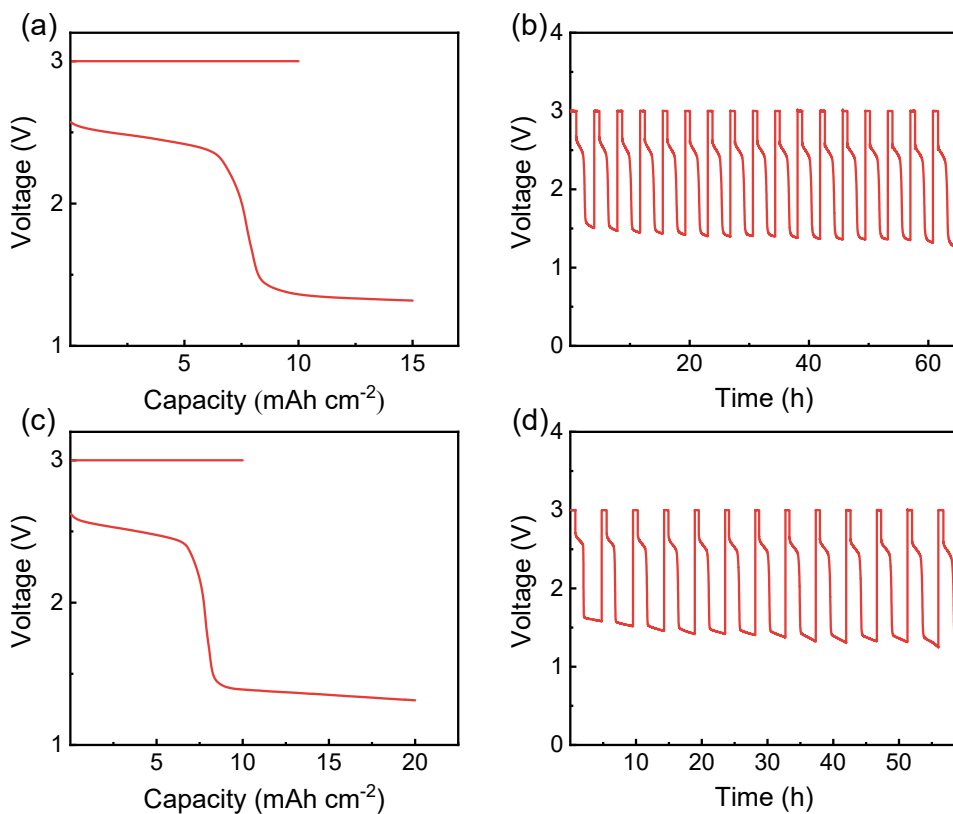

**Fig. S10** Cycle stability of Zn-MnO<sub>2</sub>/air battery with 10 mAh cm<sup>-2</sup> charge and different discharge capacity at 5 mA cm<sup>-2</sup>. (a, b) Discharge to 15 mAh cm<sup>-2</sup>; (c, d) Discharge to 20 mAh cm<sup>-2</sup>.

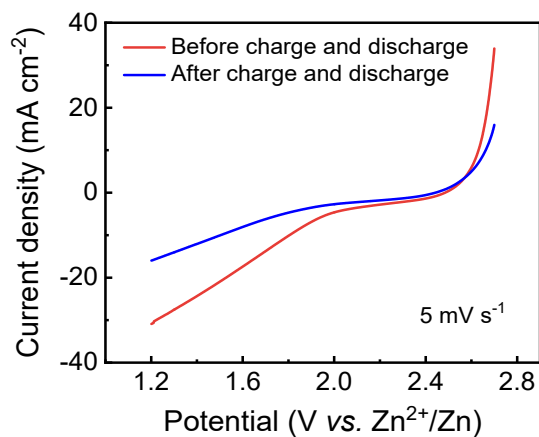

**Fig. S11** (a) Comparison of ORR reduction current before and after charge and discharge.

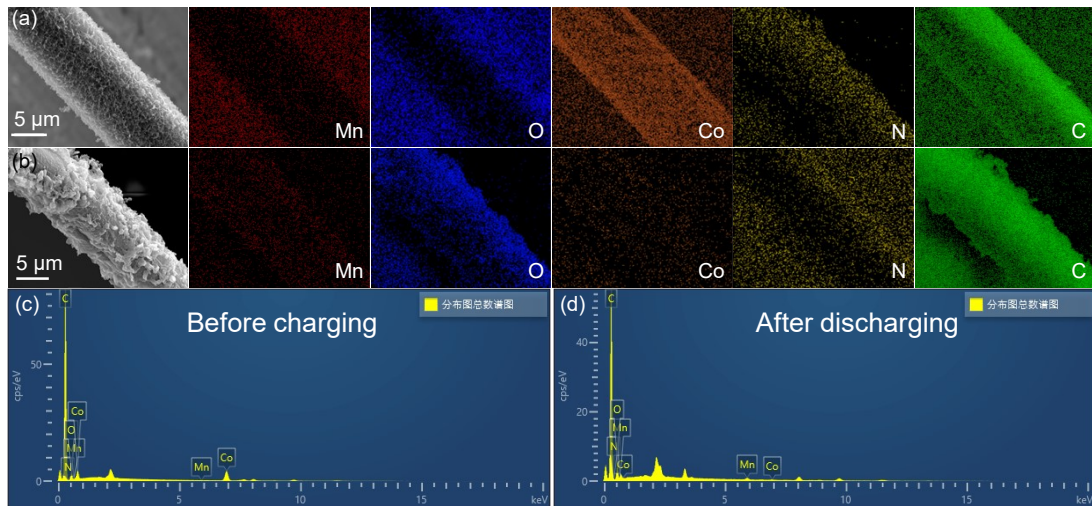

**Fig. S12** (a, b) SEM and mapping comparison of electrodes of hybrid battery after charging of  $10 \text{ mAh cm}^{-2}$  and completely discharging of  $25 \text{ mAh cm}^{-2}$  at  $2 \text{ mA cm}^{-2}$  current density. (c, d) EDS of C@Co-N-C electrode assemble in Zn-MnO<sub>2</sub>/air battery before charging and after discharging.

**Table S6** Comparison of element content on Co-N-C electrode before charging and after discharging

| Element | Before charging (Wt%) | After discharging (Wt%) |
|---------|-----------------------|-------------------------|
| C       | 89.59                 | 86.39                   |
| N       | 0.00                  | 0.00                    |
| O       | 7.32                  | 13.11                   |
| Mn      | 0.00                  | 0.38                    |
| Co      | 3.08                  | 0.12                    |

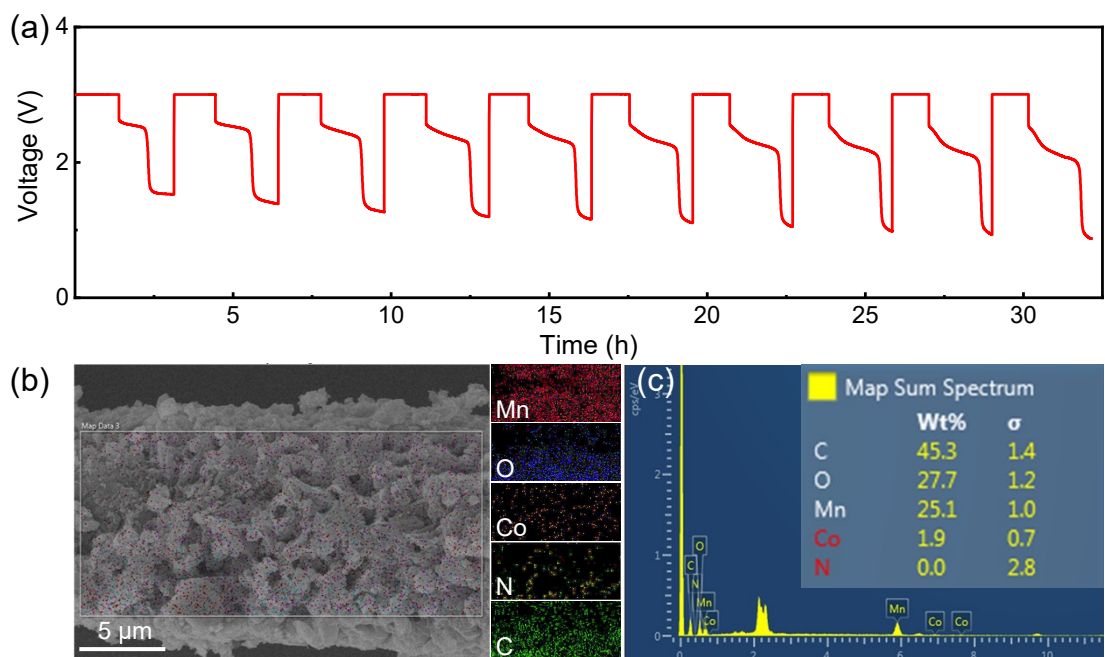

**Fig. S13** (a) Time-voltage profiles of the Zn-MnO<sub>2</sub>/air composite battery over 10 cycles with charge to 10 mAh cm<sup>-2</sup> and discharge to 10 mAh cm<sup>-2</sup> at 5 mA cm<sup>-2</sup>; (b) SEM images of the multifunctional electrode after 10 cycles, together with elemental mapping of the selected regions; (c) EDS spectra of the cycled electrode and the corresponding elemental composition.

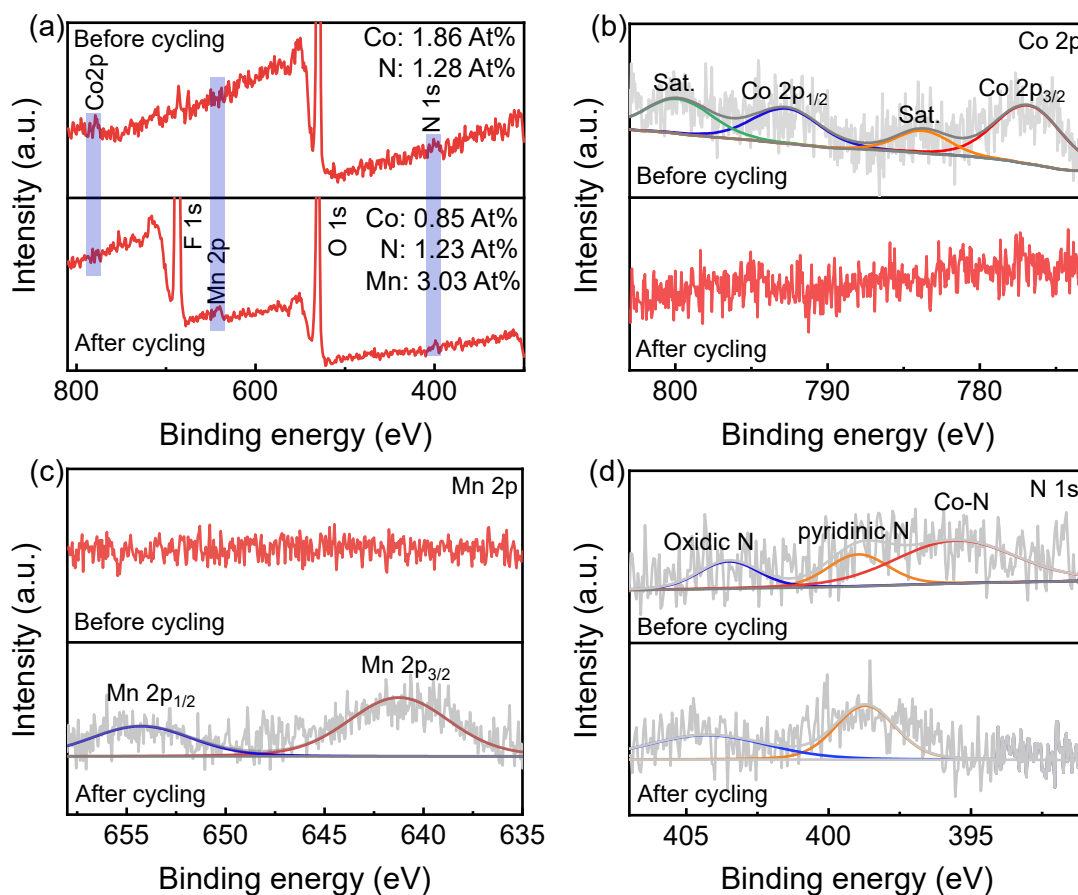

**Fig. S14** XPS of C@Co-N-C electrode before and after 10 cycles with charge to 10 mAh cm<sup>-2</sup> and discharge to 10 mAh cm<sup>-2</sup> at 5 mA cm<sup>-2</sup>. (a) A survey scan; (b) Co 2p; (c) Mn 2p; (d) N 1s.

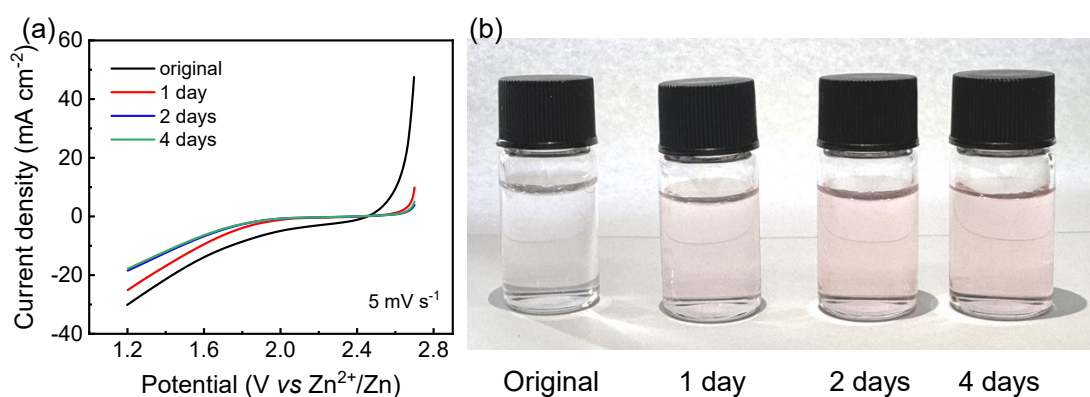

**Fig. S15** Comparison of performance (a) and color changes (b) of the C@Co-N-C electrode in the battery after different storage periods.

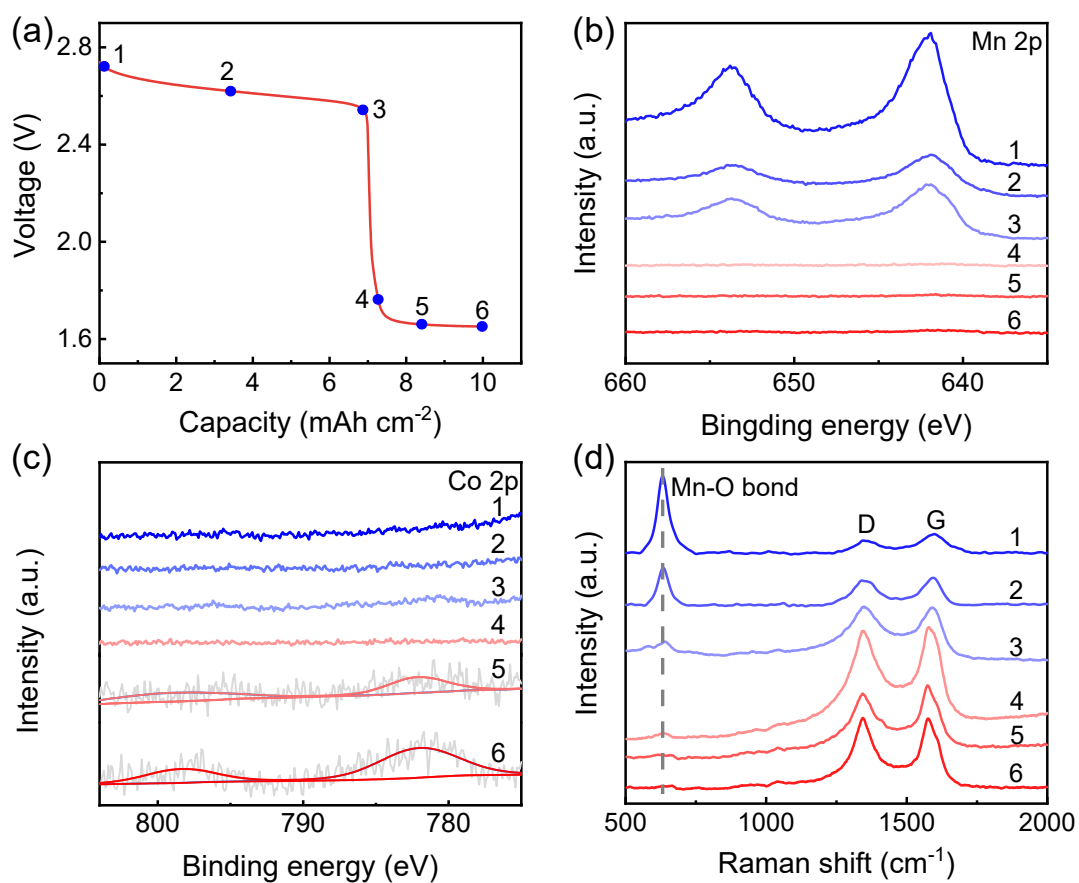

**Fig. S16** (a) Discharge curve of hybrid Zn-MnO<sub>2</sub>/air battery at a charge capacity of 10 mAh cm<sup>-2</sup>. *Ex-situ* XPS of Mn 2p (b), Co 2p (c) and Raman curves (d) of at different discharge voltage in (a) (1: initial stage, 2.72 V; 2: 2.62 V; 3: 2.56 V; 4: 1.75 V; 5: 1.66 V; 6: 1.65 V).

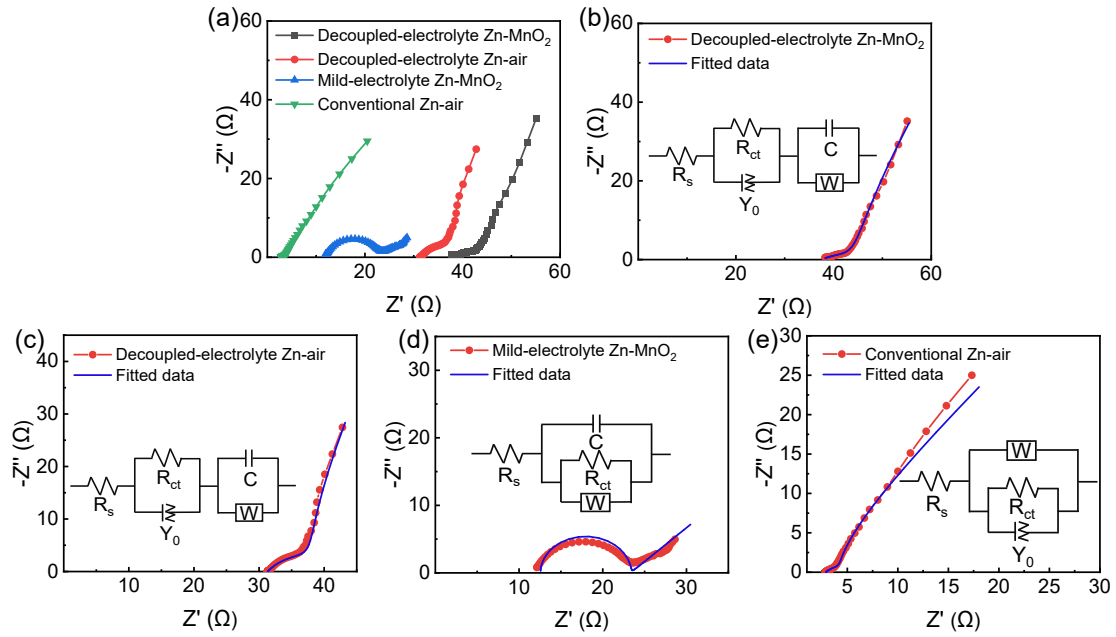

**Fig. S17** (a) Nyquist plots of decoupled electrolyte Zn-MnO<sub>2</sub> batteries, decoupled electrolyte Zn-air batteries, mild electrolyte Zn-MnO<sub>2</sub> batteries and conventional Zn-air batteries; (b) Nyquist plots and fitted data of decoupled electrolyte Zn-MnO<sub>2</sub> batteries; (c) Nyquist plots and fitted data of decoupled electrolyte Zn-air batteries; (d) Nyquist plots and fitted data of mild electrolyte Zn-MnO<sub>2</sub> batteries; (e) Nyquist plots and fitted data of conventional Zn-air batteries.

## References

- 1 B. Jiang, Y. He, B. Li, S. Zhao, S. Wang, Y.-B. He and Z. Lin, *Angew. Chem. Int. Ed.*, 2017, **56**, 1869-1872.
- 2 C. Guan, X. Liu, W. Ren, X. Li, C. Cheng and J. Wang, *Adv. Energy Mater.*, 2017, **7**, 1602391.
- 3 S. M. Hosseini, E. Jashni, S. Amani and B. Van der Bruggen, *J. Colloid Interface Sci.*, 2017, **505**, 763-775.
- 4 T. Luo, S. Abdu and M. Wessling, *J. Membr. Sci.*, 2018, **555**, 429-454.
- 5 D. Chao, C. Ye, F. Xie, W. Zhou, Q. Zhang, Q. Gu, K. Davey, L. Gu and S. Z. Qiao, *Adv. Mater.*, 2020, **32**, 2001894.
- 6 C. Liu, X. Chi, Q. Han and Y. Liu, *Adv. Energy Mater.*, 2020, **10**, 1903589.
- 7 C. Liu, X. Chi, C. Yang and Y. Liu, *Energy Environ. Mater.*, 2022, **6**, e12300.
- 8 X. Shen, X. Wang, Y. Zhou, Y. Shi, L. Zhao, H. Jin, J. Di and Q. Li, *Adv. Funct. Mater.*, 2021, **31**, 2101579.
- 9 Z. Liu, Y. Yang, S. Liang, B. Lu and J. Zhou, *Small Struct.*, 2021, **2**, 2100119.
- 10 J. Lei, Y. Yao, Z. Wang and Y. C. Lu, *Energy Environ. Sci.*, 2021, **14**, 4418-4426.
- 11 R. Liang, J. Fu, Y.-P. Deng, Y. Pei, M. Zhang, A. Yu and Z. Chen, *Energy Storage Mater.*, 2021, **36**, 478-484.
- 12 X. Zheng, Y. Wang, Y. Xu, T. Ahmad, Y. Yuan, J. Sun, R. Luo, M. Wang, M. Chuai, N. Chen, T. Jiang, S. Liu and W. Chen, *Nano Lett.*, 2021, **21**, 8863-8871.
- 13 X. Zheng, R. Luo, T. Ahmad, J. Sun, S. Liu, N. Chen, M. Wang, Y. Yuan, M. Chuai, Y. Xu, T. Jiang and W. Chen, *Energy Environ. Mater.*, 2023, **6**, e12433.
- 14 Z. Shen, Y. Liu, L. Luo, J. Pu, Y. Ji, J. Xie, L. Li, C. Li, Y. Yao and G. Hong, *Small*, 2022, **18**, 2204683.
- 15 S. Gao, B. Li, H. Tan, F. Xia, O. Dahunsi, W. Xu, Y. Liu, R. Wang and Y. Cheng, *Adv. Mater.*, 2022, **34**, 2201510.
- 16 Y. Cui, Z. Zhuang, Z. Xie, R. Cao, Q. Hao, N. Zhang, W. Liu, Y. Zhu and G. Huang, *ACS Nano*, 2022, **16**, 20730-20738.
- 17 C. Xie, T. Li, C. Deng, Y. Song, H. Zhang and X. Li, *Energy Environ. Sci.*, 2020, **13**, 135-143.
- 18 Y. Liu, Z. Qin, X. Yang, J. Liu, X. X. Liu and X. Sun, *ACS Energy Lett.*, 2022, **7**, 1814-1819.
- 19 P. Ruan, X. Chen, L. Qin, Y. Tang, B. Lu, Z. Zeng, S. Liang and J. Zhou, *Adv. Mater.*, 2023, **35**,

- 2300577.
- 20 X. Xue, Z. Liu, S. Eisenberg, Q. Ren, D. Lin, E. Coester, H. Zhang, J. Z. Zhang, X. Wang and Y. Li, *ACS Energy Lett.*, 2023, **8**, 4658-4665.
- 21 Q. Chen, J. Li, C. Liao, W. Liang, X. Lou, Z. Liu, J. Zhang, Y. Tang, L. Mai, L. Zhou and K. Amine, *Nano Energy*, 2024, **126**, 109607.
- 22 Q. Wang, W. Zhou, Y. Zhang, H. Jin, X. Li, T. Zhang, B. Wang, R. Zhao, J. Zhang, W. Li, Y. Qiao, C. Jia, D. Zhao and D. Chao, *Natl. Sci. Rev.*, 2024, **11**, nwae230.
- 23 Y. Liu, C. Xie and X. Li, *Small*, 2024, **20**, 2402026.
- 24 X. Xue, Z. Liu, S. Chandrasekaran, S. Eisenberg, C. Althaus, M. C. Freyman, A. Pinongcos, Q. Ren, L. Valdovinos, C. Hsieh, B. Hu, B. Dunn, C. A. Orme, X. Wang, M. A. Worsley and Y. Li, *Adv. Mater.*, 2025, **37**, 2419505.
- 25 Y. Wang, H. Hong, Z. Wei, D. Li, X. Yang, J. Zhu, P. Li, S. Wang and C. Zhi, *Energy Environ. Sci.*, 2025, **18**, 1524-1532.
- 26 D. Chao, W. Zhou, C. Ye, Q. Zhang, Y. Chen, L. Gu, K. Davey and S.-Z. Qiao, *Angew. Chem. Int. Ed.*, 2019, **58**, 7823-7828.
- 27 M. Chuai, H. Tong, Z. Yang, S. Deng, M. Wu, J. Xing and G. Chai, *J. Am. Chem. Soc.*, 2025, **147**, 31591-31602.
- 28 W. Fan, S. Tian, L. Qin, T. S. Alomar, P. Ruan, Z. M. El-Bahy, N. AlMasoud, B. Lu and J. Zhou, *J. Am. Chem. Soc.*, 2025, **147**, 18694-18703.
- 29 H. Chen, P. Ruan, H. Zhang, Z. M. El-Bahy, M. M. Ibrahim, B. Lu and J. Zhou, *Angew. Chem. Int. Ed.*, 2025, **64**, e202423999.
- 30 R. Liu, C. Wang, F. Wan, K. Hu, D. Yang, Y. Xia, W. Yin, Y. Lin, Y. Chen, S. Sun and W. Chen, *Adv. Funct. Mater.*, 2025, **36**, e17166.
- 31 M. Zhang, T. Xu, W. Liu, H. Zhang, J. Qi, X. Wang, Y. Wang, L. Zhu, K. Liu, J. Wang and C. Si, *Carbon Energy*, 2025, e70097.
- 32 S. Liu, D. Jiang, N. Lu, L. Li, Z. Zhang, G. Kang, S. Wang and G. Wang, *ACS Appl. Mater. Interfaces*, 2025, **17**, 69449-69457.
- 33 Q. Li, M. Xu, S. Wei, A. Kumar, K. K. Abdalla, Y. Wang, L. Yu, M. Liu, X. Jin, J. Li, L. Song, Y. Zhao and X. Sun, *Energy Environ. Sci.*, 2025, **18**, 7939-7949.
- 34 W. Zhuang, Z. Wang, C. Li, K. Zhang, X. Chen, L. Lin, Z. Shao, W. Wang, Y. Tan, S. Cheng, R. Lin,

- G. Hong and Y. Yao, *Adv. Mater.*, 2026, **38**, e22827.
- 35 K. Chen, R. Li, S. Zhang, Y. Li, B. Guo, X. Wang and Y. Liu, *Chem. Eng. J.*, 2026, **530**, 173494.
- 36 Y. Hu, D. Zhang, Z. Liu, H. He, H. Wang, C. Deng and S. Zhang, *J. Colloid Interface Sci.*, 2026, **704**, 139462.
- 37 J. Wei, L. Tan, Q. Ma, X. Long, S. Li, Y. Shi, R. Gao, Z. Xu, D. Luo, J. Zhang, D. Li, X. Wang, A. Yu and Z. Chen, *Nano-Micro Lett.*, 2026, **18**, 124.
- 38 J. Li, C. Li, B. Liu, Y. Li, O. Borodin and L. F. Nazar, *Nat. Energy*, 2026, **11**, 299-312.
- 39 Y. Ma, L. Li, Q. Liu, W. Yang, X. Cao, Y. He, J. Wang, Z. Li and L. Wang, *ACS Sustain. Chem. Eng.*, 2026, **14**, 5076-5087.
- 40 D. Kim, S. Jung, G. Park, M.-j. Song, D. Lee, J. Y. Lee, H. Choi, J. Kim, Y. Shin, J. Na, H. Lim, S. Oh, S.-M. Bak and J. Kim, *Applied Catalysis B: Environment and Energy*, 2026, **390**, 126624.
- 41 Z. Wu, G. Zhang, X. Zuo, H. Ba, Y. Yu, Y. Shen and G. Shao, *Applied Catalysis B: Environment and Energy*, 2026, **391**, 126665.
- 42 H. Pan, M. Li, J. Liu, Q. Li, J. Wu, L. Tian, X. Huang, J. Yu, H. Li, J. Dou and X. Chen, *J. Colloid Interface Sci.*, 2026, **713**, 140178.
- 43 H. Lee, B. Lee, J. Shin, K. Min and S.-H. Baeck, *Journal of Energy Storage*, 2026, **154**, 121213.
- 44 M. Zeng, H. Shi, W. Cui, X. Wu, S. Liang, W. Wang, N. Akbarjon and Z. Xu, *J. Alloys Comp.*, 2026, **1061**, 187371.
- 45 Y.-N. Chen, W. Liao, S. Yao, C. Wang, Z. Liu, L. E, D. Zhao, J. Li, W. Ding, H. Zhang and S. Wu, *J. Alloys Comp.*, 2026, **1060**, 187320.
- 46 S. Guo and B. Hui, *Mater. Today Energy*, 2026, **58**, 102264.
- 47 Y. Tan, A. Li, Y. Wang, X. Jiang, Y. Cheng, D. Chao, Y. Zhang and C. Cheng, *Nano-Micro Lett.*, 2026, **18**, 272.
- 48 G. L. Li, L. Xu, F. Jiang, Q. Zhuo, C. Jin, X. L. Zhang, Y. Yan, N. Gao and Q. Mao, *Small*, 2026, **0**, e12895.
- 49 R. Xin, H. Zhao, Y. Liu, Y. Yuan, S. Liu, D. Li, M. Yang, B. Liu, S. Ding and Z. Lin, *Adv. Funct. Mater.*, 2025, e24205.
- 50 P. Tan, B. Chen, H. Xu, W. Cai, W. He, H. Zhang, M. Liu, Z. Shao and M. Ni, *ACS Appl. Mater. Interfaces*, 2018, **10**, 36873-36881.
- 51 L. Ma, S. Chen, Z. Pei, H. Li, Z. Wang, Z. Liu, Z. Tang, J. A. Zapien and C. Zhi, *ACS Nano*, 2018,

- 12**, 8597-8605.
- 52 C.-C. Chang, Y.-C. Lee, H.-J. Liao, Y.-T. Kao, J.-Y. An and D.-Y. Wang, *ACS Sustain. Chem. Eng.*, 2018, **7**, 2860-2866.
- 53 P. Tan, B. Chen, H. Xu, W. Cai, W. He, M. Liu, Z. Shao and M. Ni, *Small*, 2018, **14**, 1800225.
- 54 P. Tan, B. Chen, H. Xu, W. Cai, W. He and M. Ni, *Appl. Catal. B Environ.*, 2019, **241**, 104-112.
- 55 X. Wang, X. Xu, J. Chen and Q. Wang, *ACS Sustain. Chem. Eng.*, 2019, **7**, 12331-12339.
- 56 Z. Huang, X. Li, Q. Yang, L. Ma, F. Mo, G. Liang, D. Wang, Z. Liu, H. Li and C. Zhi, *J. Mater. Chem. A*, 2019, **7**, 18915-18924.
- 57 D. Xu, S. Wu, X. Xu and Q. Wang, *ACS Sustain. Chem. Eng.*, 2020, **8**, 4384-4391.
- 58 T. Zhang, S. Zhang, S. Cao, Q. Yao and J. Y. Lee, *Energy Storage Mater.*, 2020, **33**, 181-187.
- 59 M. Wu, G. Zhang, N. Chen, W. Chen, J. Qiao and S. Sun, *Energy Storage Mater.*, 2020, **24**, 272-280.
- 60 G. Zhang, X. Liu, L. Wang, G. Xing, C. Tian and H. Fu, *ACS Nano*, 2022, **16**, 17139-17148.
- 61 Y. Ma, Z. Zhao, Y. Cui, J. Yu and P. Tan, *Small*, 2023, **20**, 2308500.
- 62 Z. Xu, J. Chen, T. Zhang, H. Lu, L. Yan, J. Ning and Y. Hu, *Adv. Energy Mater.*, 2024, **15**, 2402839.
- 63 Y. Feng, S. Luo, A. Duan, M. Li, B. Zhang and W. Sun, *Adv. Energy Mater.*, 2025, 2501294.
- 64 B. Li, J. Quan, A. Loh, J. Chai, Y. Chen, C. Tan, X. Ge, T. S. A. Hor, Z. Liu, H. Zhang and Y. Zong, *Nano Lett.*, 2016, **17**, 156-163.
